# Supplementary material for: miR-202-3p Regulates Sertoli Cell Proliferation, Synthesis Function, and Apoptosis by Targeting LRP6 and Cyclin D1 of Wnt/β-Catenin Signaling
Source: PubMed Central journal article supplement — Mol Ther Nucleic Acids. 2018 Oct 25;14:1–19. doi: 10.1016/j.omtn.2018.10.012 (PMC6280020; doi:10.1016/j.omtn.2018.10.012), 2018-10-25
Supplement: mmc1.pdf [file mmc1.pdf]

## **Supplemental Information**

### **miR-202-3p Regulates Sertoli Cell Proliferation, Synthesis Function, and Apoptosis by Targeting LRP6 and Cyclin D1 of Wnt/ $\beta$ -Catenin Signaling**

**Chao Yang, Chencheng Yao, Ruhui Tian, Zijue Zhu, Liangyu Zhao, Peng Li, Huixing Chen, Yuhua Huang, Erlei Zhi, Yuehua Gong, Yunjing Xue, Hong Wang, Qingqing Yuan, Zuping He, and Zheng Li**

## Supplemental Figures

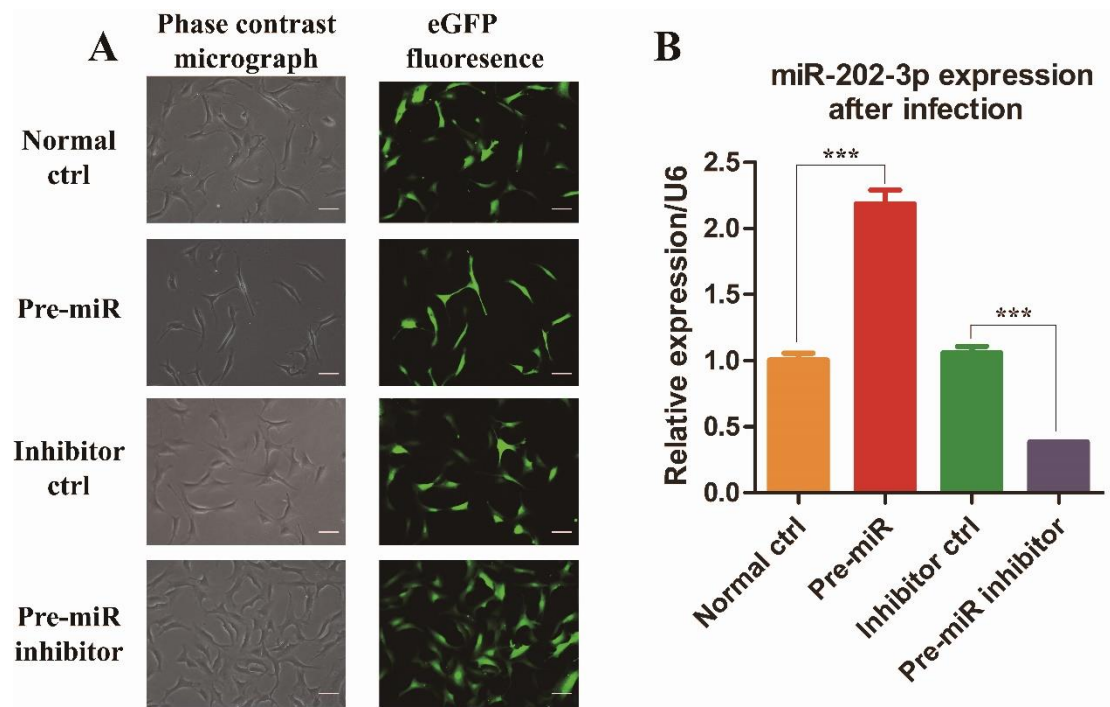

**Figure S1. Establishment of stable cell strains with upregulated or downregulated miR-202-3p.** Stable cell strains with upregulated or downregulated miR-202-3p and corresponding controls were established in OA Sertoli cells using virus infection and 2  $\mu$ g/ml puromycin screening for about 120 hours. Cell strains that expressed pGMLV-MA2, pGMLV-MA2-miR-202-3p, pGMLV-SC5, and pGMLV-SC5-miR-202-3p inhibitor stably were named Normal ctrl, Pre-miR, Inhibitor ctrl, and Pre-miR inhibitor, respectively. **(A)** eGFP fluorescence after virus infection and puromycin screening. Scale bars in A=20  $\mu$ m. **(B)** Different miR-202-3p expression was normalized to U6 among the four cell strains. Notes: \* $P < 0.05$ .

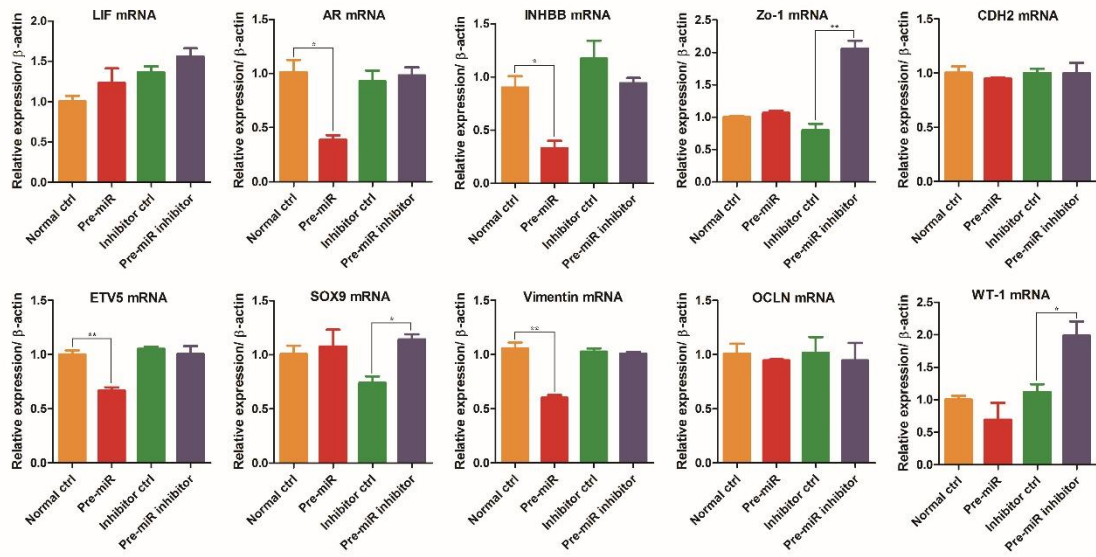

**Figure S2.** The mRNA levels of genes related to Sertoli cell functions that showed no significant difference among the four cell strains.

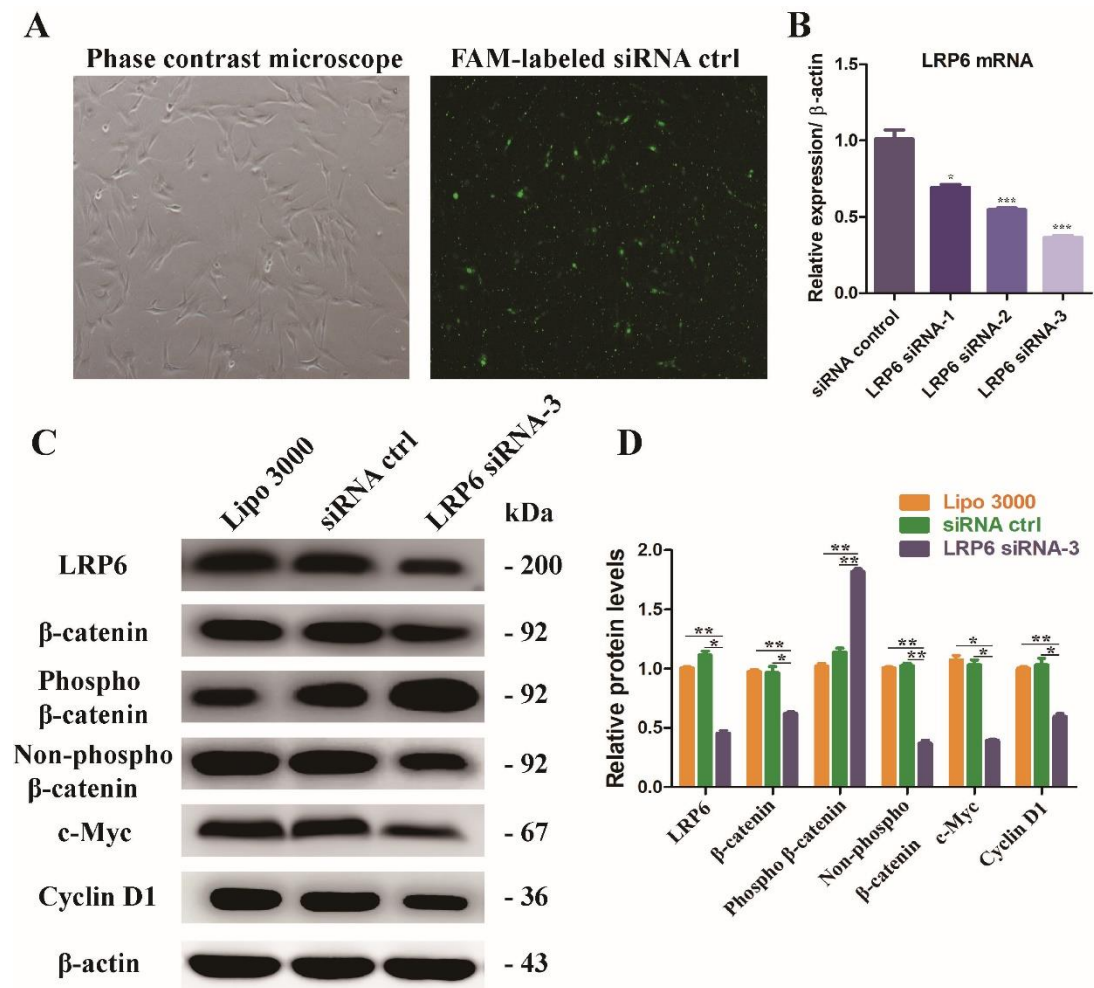

**Figure S3. Knockdown of LRP6 using siRNA in Sertoli cells.** (A) The transfection with FAM-labeled siRNA at 6 hours showed the transfection efficiency of LRP6 siRNAs. (B) qRT-PCR showed the transcription of LRP6 in human Sertoli cells at 24 hours after transfection with LRP6 siRNAs and control siRNA. (C-D) Western blots demonstrated the LRP6, β-catenin, Phospho-β-catenin, Non-phospho β-catenin, c-Myc, and Cyclin D1 protein expressions in human Sertoli cells at 48 hours after transfection with control siRNA or LRP6 siRNA-3. β-actin served as a loading control of proteins.

Supplemental Tables

Table S1. Primer sequences used for quantitative RT-PCR

| Genes           | Primer sequences (5'-3')  | Product size (bp) | Tm (°C) |
|-----------------|---------------------------|-------------------|---------|
| <i>GDNF</i>     | F:GGCAGTGCTTCCTAGAAGAGA   | 111               | 60.9    |
|                 | R:AAGACACAACCCCGTTTTTG    |                   | 61.3    |
| <i>SCF</i>      | F:AATCCTCTCGTCAAAACTGAAGG | 163               | 60.2    |
|                 | R:CCATCTCGCTTATCCAACAATGA |                   | 60.4    |
| <i>BMP4</i>     | F:ATGATTCTCGTAACCGAATGC   | 93                | 60.4    |
|                 | R:CCCCGTCTCAGGTATCAAAC    |                   | 60.9    |
| <i>WT1</i>      | F:CACAGCACAGGGTACGAGAG    | 133               | 61.9    |
|                 | R:CAAGAGTCGGGGCTACTCCA    |                   | 62.8    |
| <i>GATA4</i>    | F:CGACACCCCAATCTCGATATG   | 117               | 60.0    |
|                 | R:GTTGCACAGATAGTGACCCGT   |                   | 62.1    |
| <i>SOX9</i>     | F:AGCGAACGCACATCAAGAC     | 85                | 60.7    |
|                 | R:CTGTAGGCGATCTGTTGGGG    |                   | 62.0    |
| <i>Zo-1</i>     | F:ACCAGTAAGTCGTCCTGATCC   | 128               | 60.6    |
|                 | R:TCGGCCAAATCTTCTCACTCC   |                   | 61.8    |
| <i>OCN</i>      | F:ACAAGCGGTTTTATCCAGAGTC  | 89                | 60.3    |
|                 | R:GTCATCCACAGGCGAAGTTAAT  |                   | 60.4    |
| <i>EGF</i>      | F:TCCTCACCCGATAATGGTGGA   | 80                | 62.1    |
|                 | R:CCAGGAAAGCAATCACATTCCC  |                   | 61.5    |
| <i>LIF</i>      | F:CCAACGTGACGGACTTCCC     | 82                | 62.6    |
|                 | R:TACACGACTATGCGGTACAGC   |                   | 61.6    |
| <i>IGF1</i>     | F:GCTCTTCAGTTCGTGTGTGGA   | 133               | 62.3    |
|                 | R:GCCTCCTTAGATCACAGCTCC   |                   | 61.7    |
| <i>INHBB</i>    | F:CGGGTCCGCCTATACTTCTTC   | 97                | 61.7    |
|                 | R:CGTAGGGCAGGAGTTTCAGG    |                   | 61.9    |
| <i>CXCL12</i>   | F:ATTCTCAACTCCAAACTGTGC   | 88                | 61.2    |
|                 | R:ACTTTAGCTTCGGGTCAATGC   |                   | 60.6    |
| <i>ETV5</i>     | F:TCAGCAAGTCCCTTTTATGGTC  | 119               | 60.0    |
|                 | R:GCTCTTCAGAATCGTGAGCCA   |                   | 62.1    |
| <i>FSHR</i>     | F:TCTGTCACTGCTCTAACAGGG   | 131               | 60.9    |
|                 | R:TGCACCTTTTTGGATGACTCG   |                   | 60.8    |
| <i>Vimentin</i> | F:AGTCCACTGAGTACCGGAGAC   | 98                | 62.4    |
|                 | R:CATTTACGCATCTGGCGTTC    |                   | 62.5    |
| <i>AR</i>       | F:GACGACCAGATGGCTGTCATT   | 106               | 62.1    |
|                 | R:GGGCGAAGTAGAGCATCCT     |                   | 60.8    |
| <i>GJA1</i>     | F:TGGTAAGGTGAAAATGCGAGG   | 123               | 60.3    |
|                 | R:GCACTCAAGCTGAATCCATAGAT |                   | 60.2    |
| <i>CDH2</i>     | F:TGCGGTACAGTGTAACGGG     | 123               | 61.5    |
|                 | R:GAAACCGGGCTATCTGCTCG    |                   | 62.7    |

|                                   |                           |     |      |
|-----------------------------------|---------------------------|-----|------|
| <i>PCNA</i>                       | F:GCGTGAACCTCACCAGTATGT   | 76  | 62.1 |
|                                   | R:TCTTCGGCCCTTAGTGTAATGAT |     | 60.9 |
| <i><math>\beta</math>-actin</i>   | F:CATGTACGTTGCTATCCAGGC   | 250 | 60.8 |
|                                   | R:CTCCTTAATGTCACGCACGAT   |     | 60.2 |
| <i>Ki-67</i>                      | F:AGAAGAAGTGGTGCTTCGGAA   | 202 | 61.3 |
|                                   | R:AGTTTGCGTGGCCTGTACTAA   |     | 61.7 |
| <i>LRP6</i>                       | F:ACGATTGTAGTTGGAGGCTTG   | 95  | 60.0 |
|                                   | R:ATGGCTTCTTCGCTGACATCA   |     | 61.8 |
| <i><math>\beta</math>-catenin</i> | F:CATCTACACAGTTTGATGCTGCT | 150 | 60.9 |
|                                   | R:GCAGTTTTGTCAGTTCAGGGA   |     | 60.4 |
| <i>c-Myc</i>                      | F:GTCAAGAGGCGAACACACAAC   | 162 | 61.7 |
|                                   | R:TTGGACGGACAGGATGTATGC   |     | 61.9 |
| <i>Cyclin D1</i>                  | F:GCTGCGAAGTGGAAACCATC    | 135 | 61.6 |
|                                   | R:CCTCCTTCTGCACACATTTGAA  |     | 60.8 |

**Table S2. The sequences of oligonucleotides for human LRP6 siRNAs**

| <b>siRNA</b>        | <b>siRNA sequences (5'-3')</b> |                       | <b>Knockdown rate</b> |
|---------------------|--------------------------------|-----------------------|-----------------------|
| LRP6<br>siRNA-1     | Sense                          | CCACAAAUCCAUGUGGAAUTT | 69.3% ±1.7%           |
|                     | Antisense                      | AUCCACAUGGAUUUGUGGTT  |                       |
| LRP6<br>siRNA-2     | Sense                          | GGUUCUGACCGUGUAGUAUTT | 54.6% ±1.3%           |
|                     | Antisense                      | AUACUACACGGUCAGAACCTT |                       |
| LRP6<br>siRNA-3     | Sense                          | GCAGUAUCAGACGAAUUUTT  | 36.4% ±1.4%           |
|                     | Antisense                      | AAAUUCGUCUGAUAUCUGCTT |                       |
| Negative<br>control | Sense                          | UUCUCCGAACGUGUCACGUTT |                       |
|                     | Antisense                      | ACGUGACACGUUCGGAGAATT |                       |
| FAM<br>control      | Sense                          | UUCUCCGAACGUGUCACGUTT |                       |
|                     | Antisense                      | ACGUGACACGUUCGGAGAATT |                       |

**Table S3. Primary antibodies used for Western blots and immunocytochemistry**

| <b>Antibodies</b>               | <b>Sources</b> | <b>Vendors</b>            | <b>Working dilutions</b> |
|---------------------------------|----------------|---------------------------|--------------------------|
| GATA4                           | Mouse          | Santa Cruz                | ICC: 1:200               |
| WT1                             | Rabbit         | Santa Cruz                | ICC: 1:200               |
| SOX9                            | Rabbit         | Millipore                 | ICC: 1:500               |
| GDNF                            | Rabbit         | Santa Cruz                | ICC: 1:300<br>WB:1:300   |
| SCF                             | Rabbit         | Santa Cruz                | ICC: 1:300<br>WB:1:300   |
| VIM                             | Rabbit         | Cell Signaling Technology | ICC: 1:100               |
| OCLN                            | Rabbit         | Abcam                     | ICC: 1:200               |
| $\alpha$ -SMA                   | Rabbit         | Abcam                     | ICC: 1:200               |
| CYP11A1                         | Rabbit         | Abcam                     | ICC: 1:200               |
| VASA                            | Goat           | Santa Cruz                | ICC: 1:100               |
| Ki-67                           | Mouse          | Santa Cruz                | ICC: 1:200               |
| PCNA                            | Mouse          | Santa Cruz                | WB:1:200                 |
| Cyclin A2                       | Rabbit         | Proteintech               | WB:1:2000                |
| Cyclin B1                       | Rabbit         | Cell Signaling Technology | WB:1:1000                |
| Cyclin D1                       | Mouse          | Proteintech               | WB:1:1000                |
| Cyclin E1                       | Mouse          | Proteintech               | WB:1:1000                |
| $\beta$ -actin                  | Mouse          | Proteintech               | WB:1:5000                |
| cleaved-PARP                    | Rabbit         | Cell Signaling Technology | WB:1:1000                |
| Bcl2                            | Mouse          | Santa Cruz                | WB:1:500                 |
| Bax                             | Mouse          | Santa Cruz                | WB:1:500                 |
| BMP4                            | Mouse          | Cell Signaling Technology | WB:1:1000                |
| FGF2                            | Rabbit         | Cell Signaling Technology | WB:1:1000                |
| CXCL12                          | Rabbit         | Cell Signaling Technology | WB:1:1000                |
| LRP6                            | Rabbit         | Cell Signaling Technology | WB:1:1000                |
| c-Myc                           | Rabbit         | Cell Signaling Technology | WB:1:1000                |
| $\beta$ -catenin                | Mouse          | Santa Cruz                | WB:1:300                 |
| Phospho- $\beta$ -catenin       | Rabbit         | Cell Signaling Technology | WB:1:1000                |
| Non-phospho<br>$\beta$ -catenin | Rabbit         | Cell Signaling Technology | WB:1:1000                |
